# Supplementary material
Source: PubMed Central journal article supplement (PMC5655077)
Supplement: AAC.01572-17_zac011176653s1.pdf [file AAC.01572-17_zac011176653s1.pdf]

## Supplemental Figures

>FosA<sup>KP</sup>

MLSGLNHLTLAVSQLAPSVAFYQQLGMTLHARWDSGAYLSCGDLWLCLSLDPQRRVTPPEES  
DYTHYAFSISEADFASFAARLEAAGVAVWKLNRSEGASHYFLDPDGHKLELHVGSQAQRLAAC  
REQPYKGMVFFEQ

>FosA<sup>PA</sup>

MLTGLNHLTLAVADLPASIAFYRDLLGFRLEARWDQGA YLELGSLWLCLSLREPQYGGPAADYT  
HYAFGIAAADFARFAAQLRAHGVREWKQNRSEGDSFYFLDPDGHRLAHVGDLSRLAACRQA  
PYAGMRFAD

>FosA3

MLQGLNHLTLAVSDLASSLAFYQQLPGMRLHASWDSGAYLSCGALWLCLSLDEQRRKTPPQES  
DYTHYAFSVAEEEFAGVVALLAQAGAEVWKDNRSEGASYYFLDPDGHKLELHVGNLAQRLAA  
CRERPYKGMVFFD

>FosA<sup>PA<sub>c</sub></sup>

MLTGLNHLTLAVADLPASIAFYRDLLGFRLEARWDQGA YLELGSLWLCLSLDPQRRVTPPEESD  
YTHYAFGIAAADFARFAAQLRAHGVREWKQNRSEGDSFYFLDPDGHRLAHVGDLSRLAACR  
QAPYAGMRFAD

>FosA<sup>KP<sub>c</sub></sup>

MLSGLNHLTLAVSQLAPSVAFYQQLGMTLHARWDSGAYLSCGDLWLCLSLREPQYGGPAADY  
THYAFSISEADFASFAARLEAAGVAVWKLNRSEGASHYFLDPDGHKLELHVGSQAQRLAACREQ  
PYKGMVFFEQ

|                                |                                                      |            |    |
|--------------------------------|------------------------------------------------------|------------|----|
| FosA <sup>PA</sup>             | MLTGLNHLTLAVADLPASIAFYRDLLGFRLEARWDQGA YLELGSLWLCLSL | REPQYGG--- | 57 |
| FosA <sup>PA<sub>c</sub></sup> | MLTGLNHLTLAVADLPASIAFYRDLLGFRLEARWDQGA YLELGSLWLCLSL | LDPQRRVTPP | 60 |
| FosA3                          | MLQGLNHLTLAVSDLASSLAFYQQLPGMRLHASWDSGAYLSCGALWLCLSL  | LDEQRRKTPP | 60 |
| FosA <sup>KP</sup>             | MLSGLNHLTLAVSQLAPSVAFYQQLGMTLHARWDSGAYLSCGDLWLCLSL   | LDPQRRVTPP | 60 |
| FosA <sup>KP<sub>c</sub></sup> | MLSGLNHLTLAVSQLAPSVAFYQQLGMTLHARWDSGAYLSCGDLWLCLSL   | REPQYGG--- | 57 |

\*\* \*\*\*\*\*:;\* \*:\*\*\*:\* \*: \*. \* \*\*.\*\*\*\*\*. \* \*\*\*\*\* : \*

|                                |     |                                                                              |     |
|--------------------------------|-----|------------------------------------------------------------------------------|-----|
| FosA <sup>PA</sup>             | PAA | DYTHYAFGIAAADFARFAAQLRAHGVREWKQNRSEGDSFYFLDPDGHRLAHVGDLSRLAACRQAPYAGMRFAD-   | 117 |
| FosA <sup>PA<sub>c</sub></sup> | EES | DYTHYAFGIAAADFARFAAQLRAHGVREWKQNRSEGDSFYFLDPDGHRLAHVGDLSRLAACRQAPYAGMRFAD-   | 120 |
| FosA3                          | QES | DYTHYAFSVAEEEFAGVVALLAQAGAEVWKDNRSEGASYYFLDPDGHKLELHVGNLAQRLAACRERPYKGMVFFD- | 120 |
| FosA <sup>KP</sup>             | EES | DYTHYAFSISEADFASFAARLEAAGVAVWKLNRSEGASHYFLDPDGHKLELHVGSQAQRLAACREQPYKGMVFFEQ | 120 |
| FosA <sup>KP<sub>c</sub></sup> | PAA | DYTHYAFSISEADFASFAARLEAAGVAVWKLNRSEGASHYFLDPDGHKLELHVGSQAQRLAACREQPYKGMVFFEQ | 117 |

:\*\*\*\*\*.: : \*\* ..\* \* \* . \*\* \*\*\*\*\* \*.\*\*\*\*\*: \*\* \*\*.\*

|                                |                     |     |
|--------------------------------|---------------------|-----|
| FosA <sup>PA</sup>             | SRLAACRQAPYAGMRFAD- | 135 |
| FosA <sup>PA<sub>c</sub></sup> | SRLAACRQAPYAGMRFAD- | 138 |
| FosA3                          | QLAACRERPYKGMVFFD-  | 138 |
| FosA <sup>KP</sup>             | QLAACREQPYKGMVFFEQ  | 139 |
| FosA <sup>KP<sub>c</sub></sup> | QLAACREQPYKGMVFFEQ  | 136 |

.\*\*\*\*\*: \*\* \* \* :

**Figure S1.** FosA sequences and alignment of wild-type and chimeric enzymes, with dimer-interface loops highlighted in yellow.

| <b>Bonds</b>     | <b><math>k_b</math> (kcal mol<sup>-1</sup> Å<sup>-2</sup>)</b>        | <b><math>b_0</math> (Å)</b>            |
|------------------|-----------------------------------------------------------------------|----------------------------------------|
| MN2 - NR2        | 200.0                                                                 | 2.18                                   |
| <b>Angles</b>    | <b><math>k_\theta</math> (kcal mol<sup>-1</sup> rad<sup>-2</sup>)</b> | <b><math>\theta_0</math> (degrees)</b> |
| CPH2 - NR2 - MN2 | 20.0                                                                  | 120.65                                 |
| CPH1 - NR2 - MN2 | 20.0                                                                  | 125.98                                 |
| NR2 - MN2 - NR2  | 100.0                                                                 | 114.00                                 |

**Table S1.** Force field parameters for Mn<sup>2+</sup> coordination.

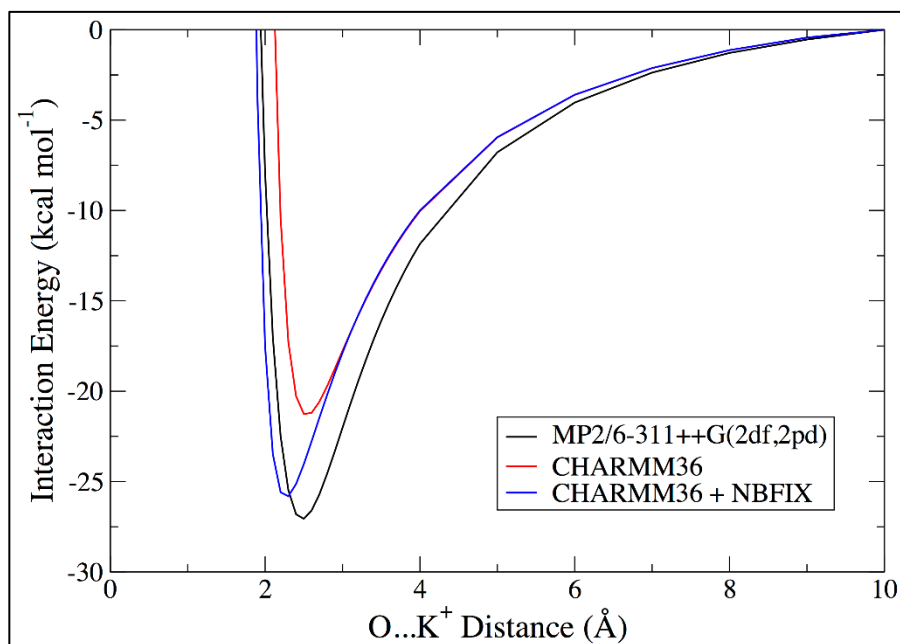

**Figure S2.** Interaction energy between NMA and a K<sup>+</sup> ion as a function of the distance between the ion and the carbonyl O atom.

|                            | <b><math>\epsilon</math> (kcal mol<sup>-1</sup>)</b> | <b><math>R_{\min}</math> (Å)</b> |
|----------------------------|------------------------------------------------------|----------------------------------|
| POT - O (combination rule) | -0.102176                                            | 3.46375                          |
| POT - O (NBFIX)            | -0.050218                                            | 3.30375                          |

**Table S2.** Combination rule and NBFIX parameters for carbonyl O - K<sup>+</sup> Interaction.

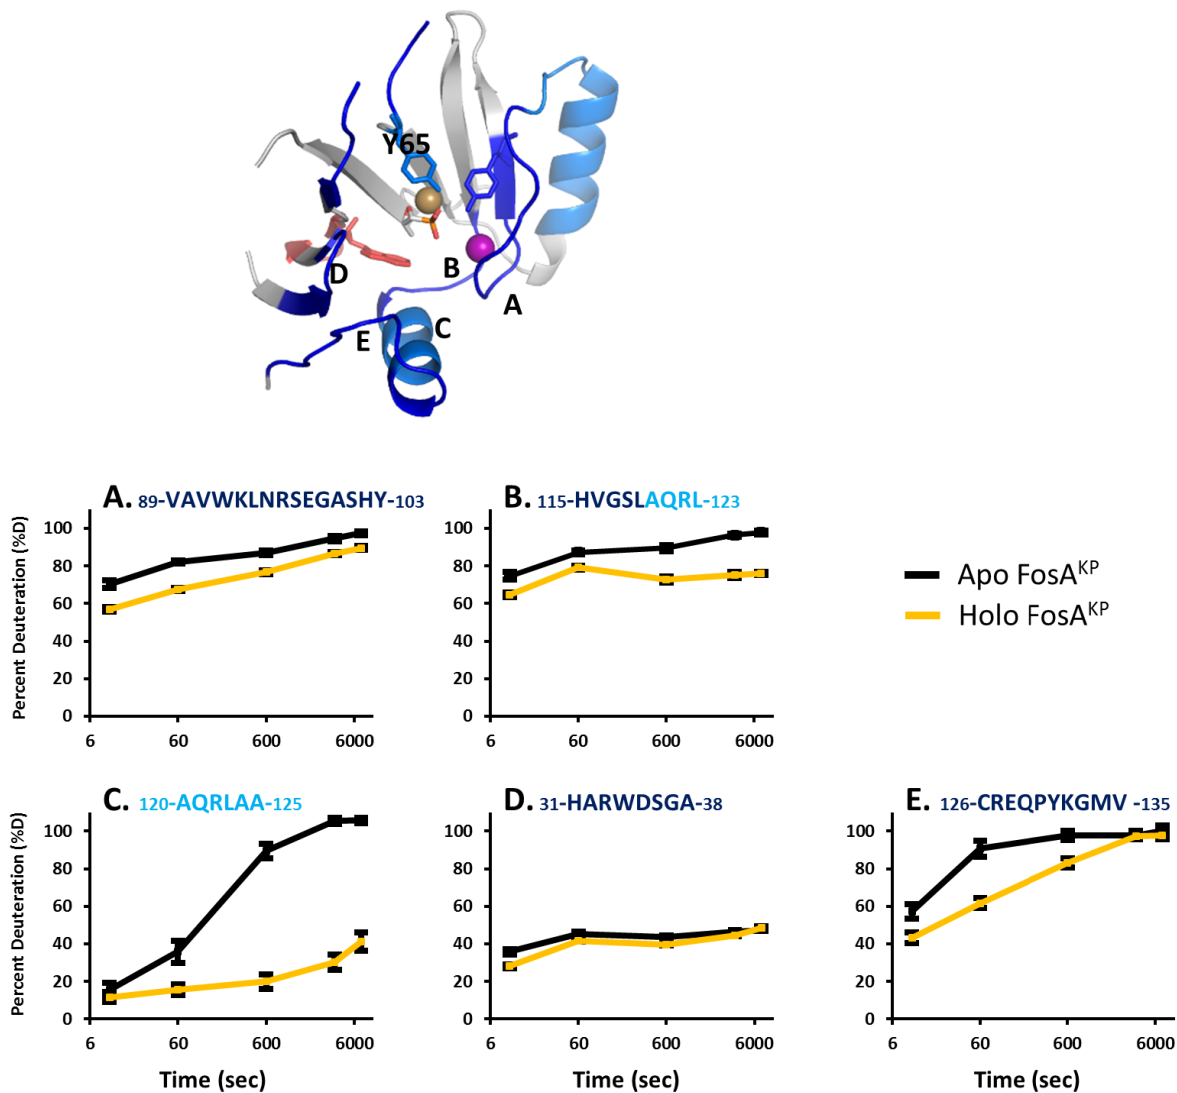

**Figure S3.** Fosfomycin-induced protection of hydrogen-deuterium exchange near the active site. Peptides displaying significant differences in deuterium uptake are mapped on the crystal structure of FosA<sup>KP</sup>. Regions with statistically significant decreases in deuterium at the earliest deuterium incubation time point (10 sec) are colored dark blue. Regions with decreases in deuterium uptake only observed at later time points are colored light blue. Regions with fosfomycin-induced increase in deuterium uptake are colored red. Important residues are shown as sticks, along with Mn<sup>2+</sup> (gold), K<sup>+</sup> (purple), and fosfomycin (sticks). Panel A through E show deuterium uptake traces for representative peptidic fragments in apo and holo FosA<sup>KP</sup>. The sequences of the peptides are shown above each panels.

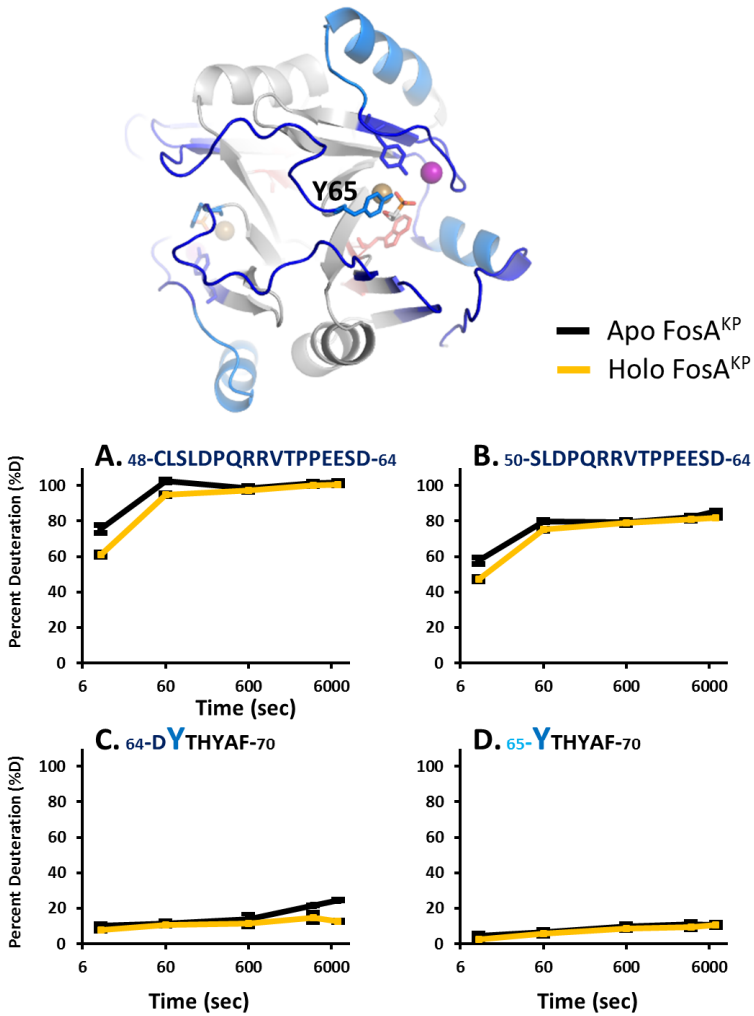

**Figure S4.** Fosfomycin-induced protection of hydrogen-deuterium exchange at the dimer interface. Peptides displaying significant differences in deuterium uptake are mapped on the crystal structure of FosA<sup>KP</sup>. Regions with statistically significant decreases in deuterium at the earliest deuterium incubation time point (10 sec) are colored dark blue. Regions with decreases in deuterium uptake only observed at later time points are colored light blue. Regions with fosfomycin-induced increase in deuterium uptake are colored red. Important residues are shown as sticks, along with Mn<sup>2+</sup> (gold), K<sup>+</sup> (purple), and fosfomycin (sticks). Panel A through D show deuterium uptake traces for representative peptidic fragments in apo and holo FosA<sup>KP</sup>. The sequences of the peptides are shown above each panels.

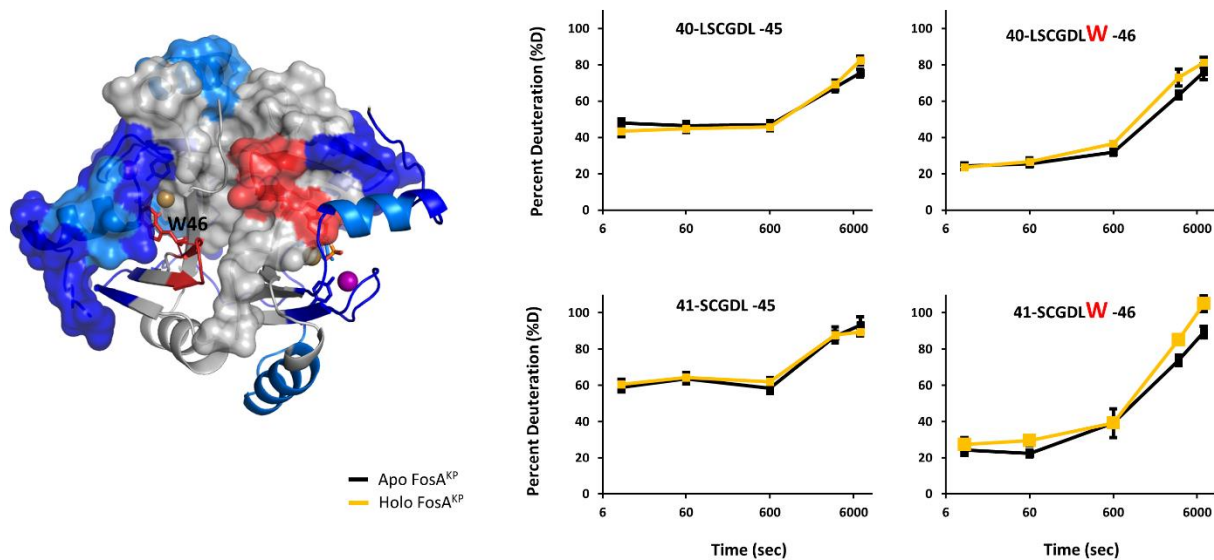

**Figure S5.** Fosfomycin-induced increase of hydrogen-deuterium exchange at W46. Peptides displaying significant differences in deuterium uptake are mapped on the crystal structure of FosA<sup>KP</sup>. Regions with statistically significant decreases in deuterium at the earliest deuterium incubation time point (10 sec) are colored dark blue. Regions with decreases in deuterium uptake only observed at later time points are colored light blue. Regions with fosfomycin-induced increase in deuterium uptake are colored red. Important residues are shown as sticks, along with Mn<sup>2+</sup> (gold), K<sup>+</sup> (purple), and fosfomycin (sticks). Panel A through D show deuterium uptake traces for representative peptidic fragments in apo and holo FosA<sup>KP</sup>. The sequences of the peptides are shown above each panels.
